# Supplementary material
Source: PubMed Central journal article supplement (PMC5210234)
Supplement: 2016_151076-Disclosures_and_Contributions.pdf [file 2016_151076-Disclosures_and_Contributions.pdf]

Haematologica  
HAEMATOL/2016/151076  
Version 3

A plasma microRNA signature as a biomarker for acquired aplastic  
anemia

Kohei Hosokawa, Sachiko Kajigaya, Xingmin Feng, Marie J. Desierto,  
Maria del Pilar Fernandez Ibanez, Olga Rios, Barbara Weinstein, Phillip  
Scheinberg, Danielle M. Townsley, and Neal S. Young

Disclosures: none

Contributions: K. Hosokawa, S. Kajigaya, X. Feng, and N.S. Young participated in the design of this analysis. K. Hosokawa conceptualized, conducted the experiments, analyzed the data, interpreted the results, and drafted the manuscript. X. Feng, M.J. Desierto, M.D.P. Fernandez Ibanez, O. Rios, B. Weinstein, P. Scheinberg, D.M. Townsley recruited patients to participate in the study. S. Kajigaya edited the manuscript. N.S. Young was involved in conceptualization, interim discussions, interpretation of results, and editing the manuscript. All authors critically reviewed the manuscript content and agree with the submission of the final manuscript. The authors declare no conflicts of interest.
